# Supplementary material
Source: Elsevier journal article supplement (https://www.sciencedirect.com/science/article/pii/S2254887418300018)
Supplement: mmc1 [file S2254887418300018:mmc1.pdf]

|                                         |                                          |
|-----------------------------------------|------------------------------------------|
| <b>Localización</b>                     | Retro-esternal (+3)                      |
|                                         | Precordial (+2)                          |
|                                         | Cuello, mandíbula, epigastrio (+1)       |
|                                         | Apical (-1)                              |
| <b>Irradiación</b>                      | Uno de los brazos (+2)                   |
|                                         | Hombro, espalada, cuello, mandíbula (+1) |
| <b>Carácter</b>                         | Fuertemente opresivo (+3)                |
|                                         | Molestia opresiva (+2)                   |
|                                         | Pinchazos (-1)                           |
| <b>Gravedad</b>                         | Grave (+2)                               |
|                                         | Moderado (+1)                            |
| <b>Factores atenuantes o agravantes</b> | Nitroglicerina (+1)                      |
| <b>Síntomas asociados</b>               | Postura (-1)                             |
|                                         | Respiración (-1)                         |
|                                         | Disnea (+2)                              |
|                                         | Náuseas o vómitos (+2)                   |
|                                         | Sudoración (+2)                          |
| <b>Historia previa</b>                  | Antecedentes de angina de esfuerzo (+3)  |

**Anexo 1. Escala de Geleijnse. Tomado de: Geleijnse M.L., Elhendy A., Kasprzak J.D. Safety and prognostic value of early dobutamine-atropine stress echocardiography in patients with spontaneous chest pain and a non-diagnostic electrocardiogram. European Heart Journal, 2000; 21: 397-406.**

## Anexo 2. Definición de variables correspondientes a factores de riesgo cardiovascular<sup>21-24</sup>.

|                                                  |                                                                                                                                                                                                                                                                                                                           |
|--------------------------------------------------|---------------------------------------------------------------------------------------------------------------------------------------------------------------------------------------------------------------------------------------------------------------------------------------------------------------------------|
| Antecedentes personales de cardiopatía isquémica | <p>Diagnóstico previo mediante cateterismo, AngioTC coronario, test de esfuerzo o pruebas isotópicas. En su defecto, historia de IAM o de angina inestable</p> <p>Antecedentes de cirugía de revascularización coronaria</p> <p>Trastornos segmentarios de la motilidad de la pared cardiaca mediante ecocardiografía</p> |
| Antecedentes familiares de cardiopatía isquémica | Diagnóstico en familiares de primer grado menores de 55 años en hombres y de 65 en mujeres                                                                                                                                                                                                                                |
| Hipertensión arterial                            | Diagnóstico previo en otro ámbito (atención primaria, medicina interna, cardiología, endocrinología) según estándares actuales                                                                                                                                                                                            |
| Diabetes Mellitus                                | Diagnóstico previo en otro ámbito (atención primaria, medicina interna, cardiología, endocrinología) según estándares actuales                                                                                                                                                                                            |
| Dislipemia                                       | Diagnóstico previo en otro ámbito (atención primaria, medicina interna, cardiología, endocrinología) según estándares actuales. Se incluyeron aquellos con aumento del colesterol total o de LDL-colesterol, hipertrigliceridemia o disminución del HDL-colesterol                                                        |
| Tabaquismo activo                                | Fumador diario de cualquier cantidad de cigarrillos en el último mes                                                                                                                                                                                                                                                      |
| Tabaquismo pasivo                                | Exposición durante una o dos horas por semana, de forma involuntaria, al humo del tabaco                                                                                                                                                                                                                                  |
| Sedentarismo                                     | Sujetos que no realizaban 2,5-5 h a la semana de ejercicio aeróbico por lo menos de intensidad moderada o 1-2,5 h de ejercicio aeróbico intenso                                                                                                                                                                           |
| Sobrepeso                                        | IMC mayor de 25                                                                                                                                                                                                                                                                                                           |
